# Supplementary material
Source: PubMed Central journal article supplement (PMC3808885)
Supplement: NIHMS522161-supplement-Supplementary_Information.pdf [file NIHMS522161-supplement-Supplementary_Information.pdf]

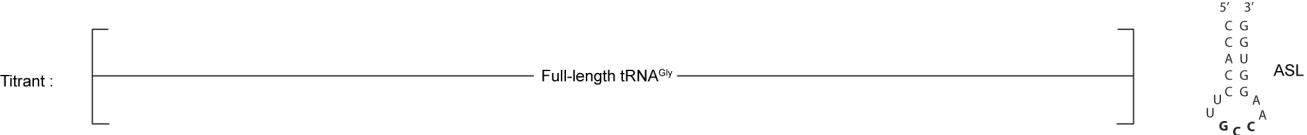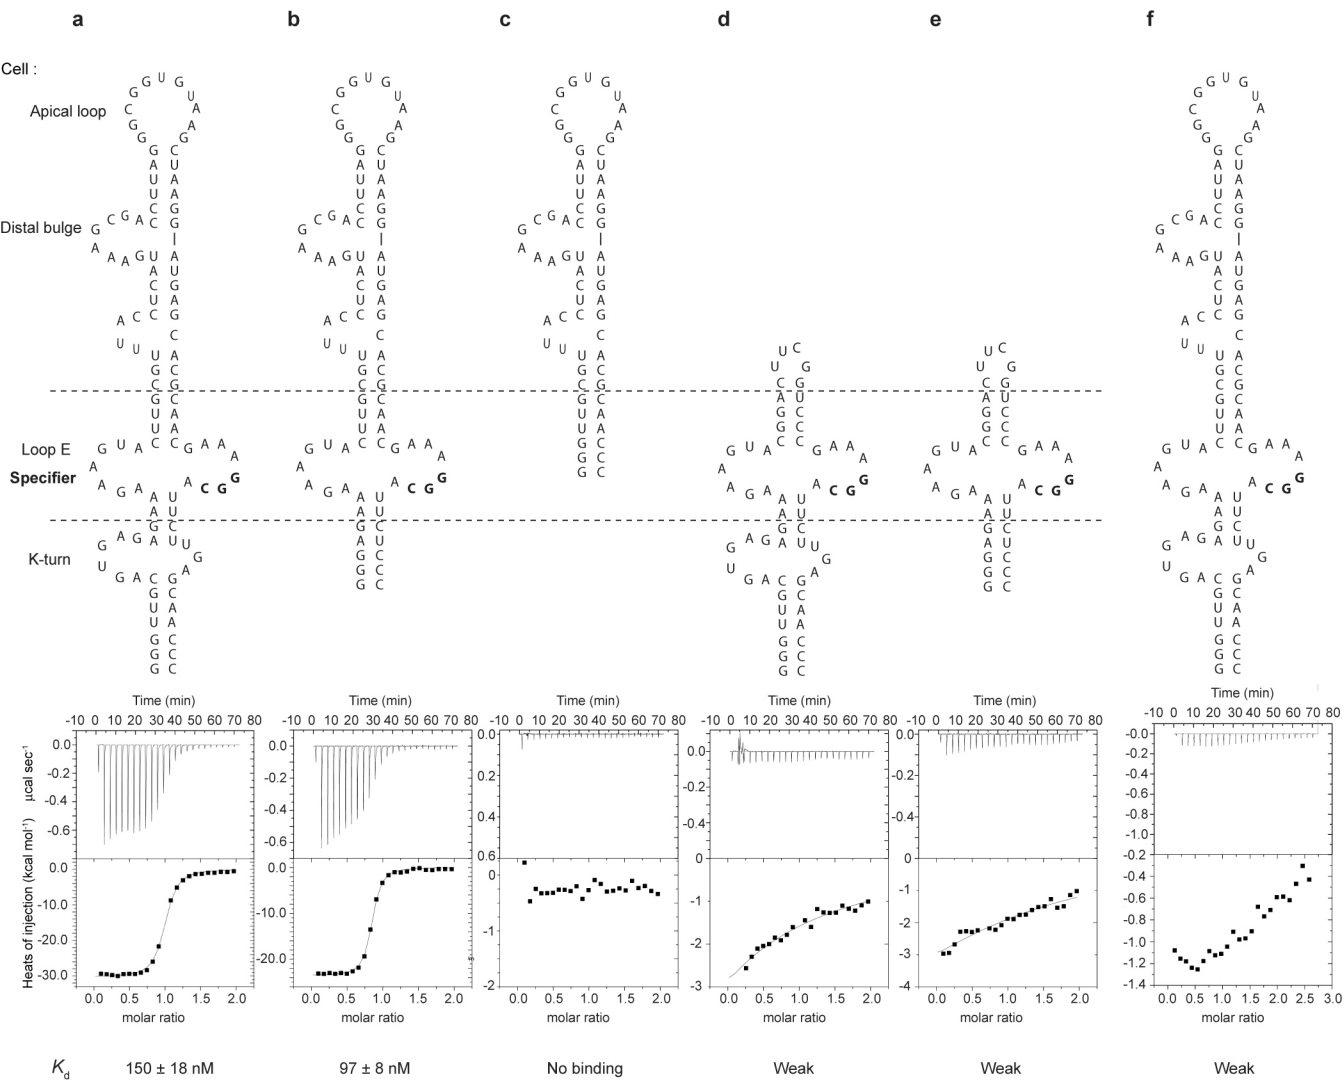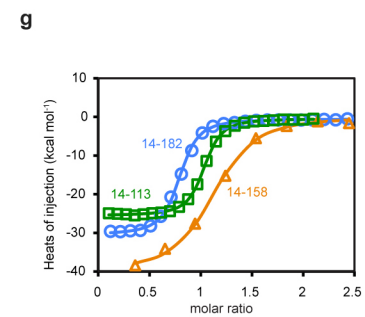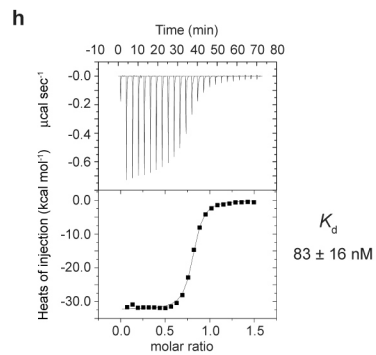

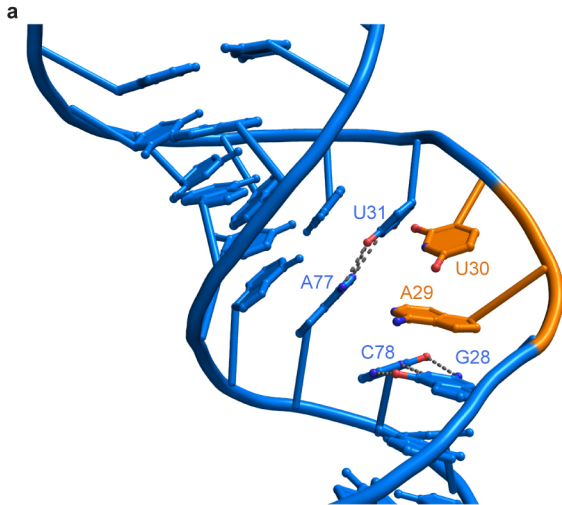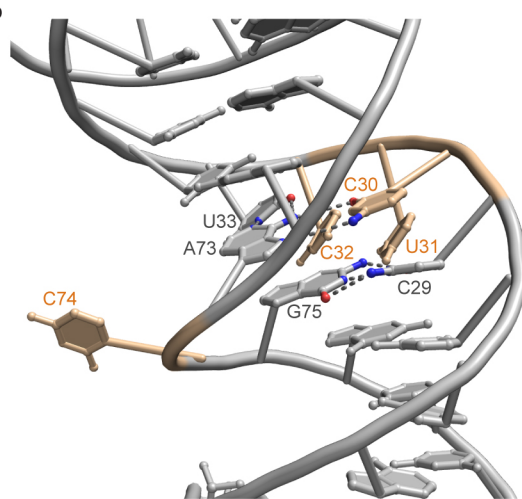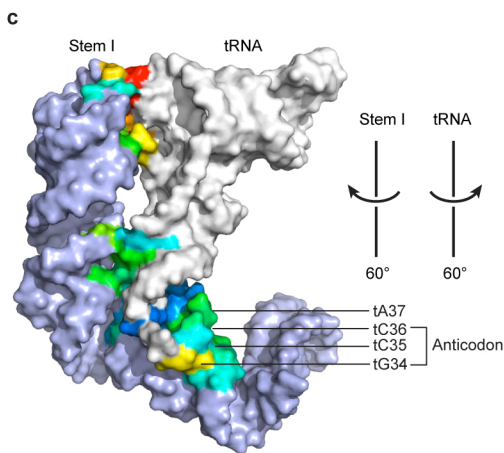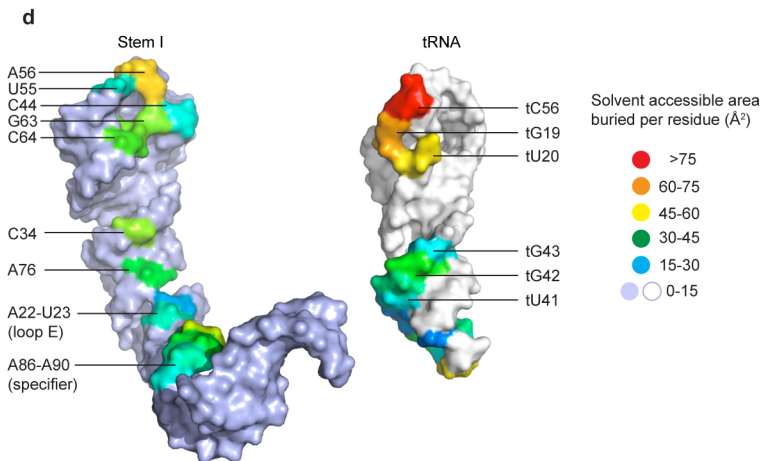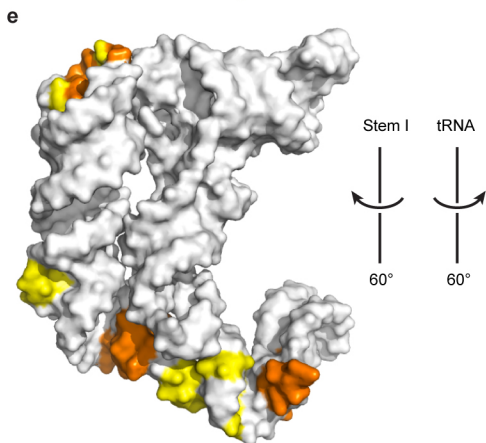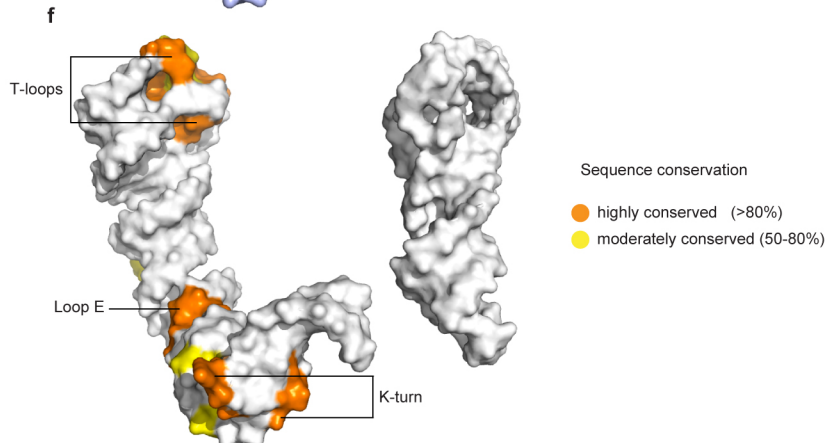

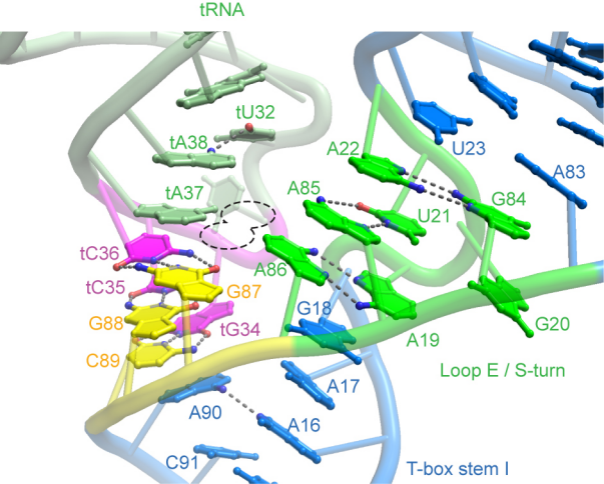



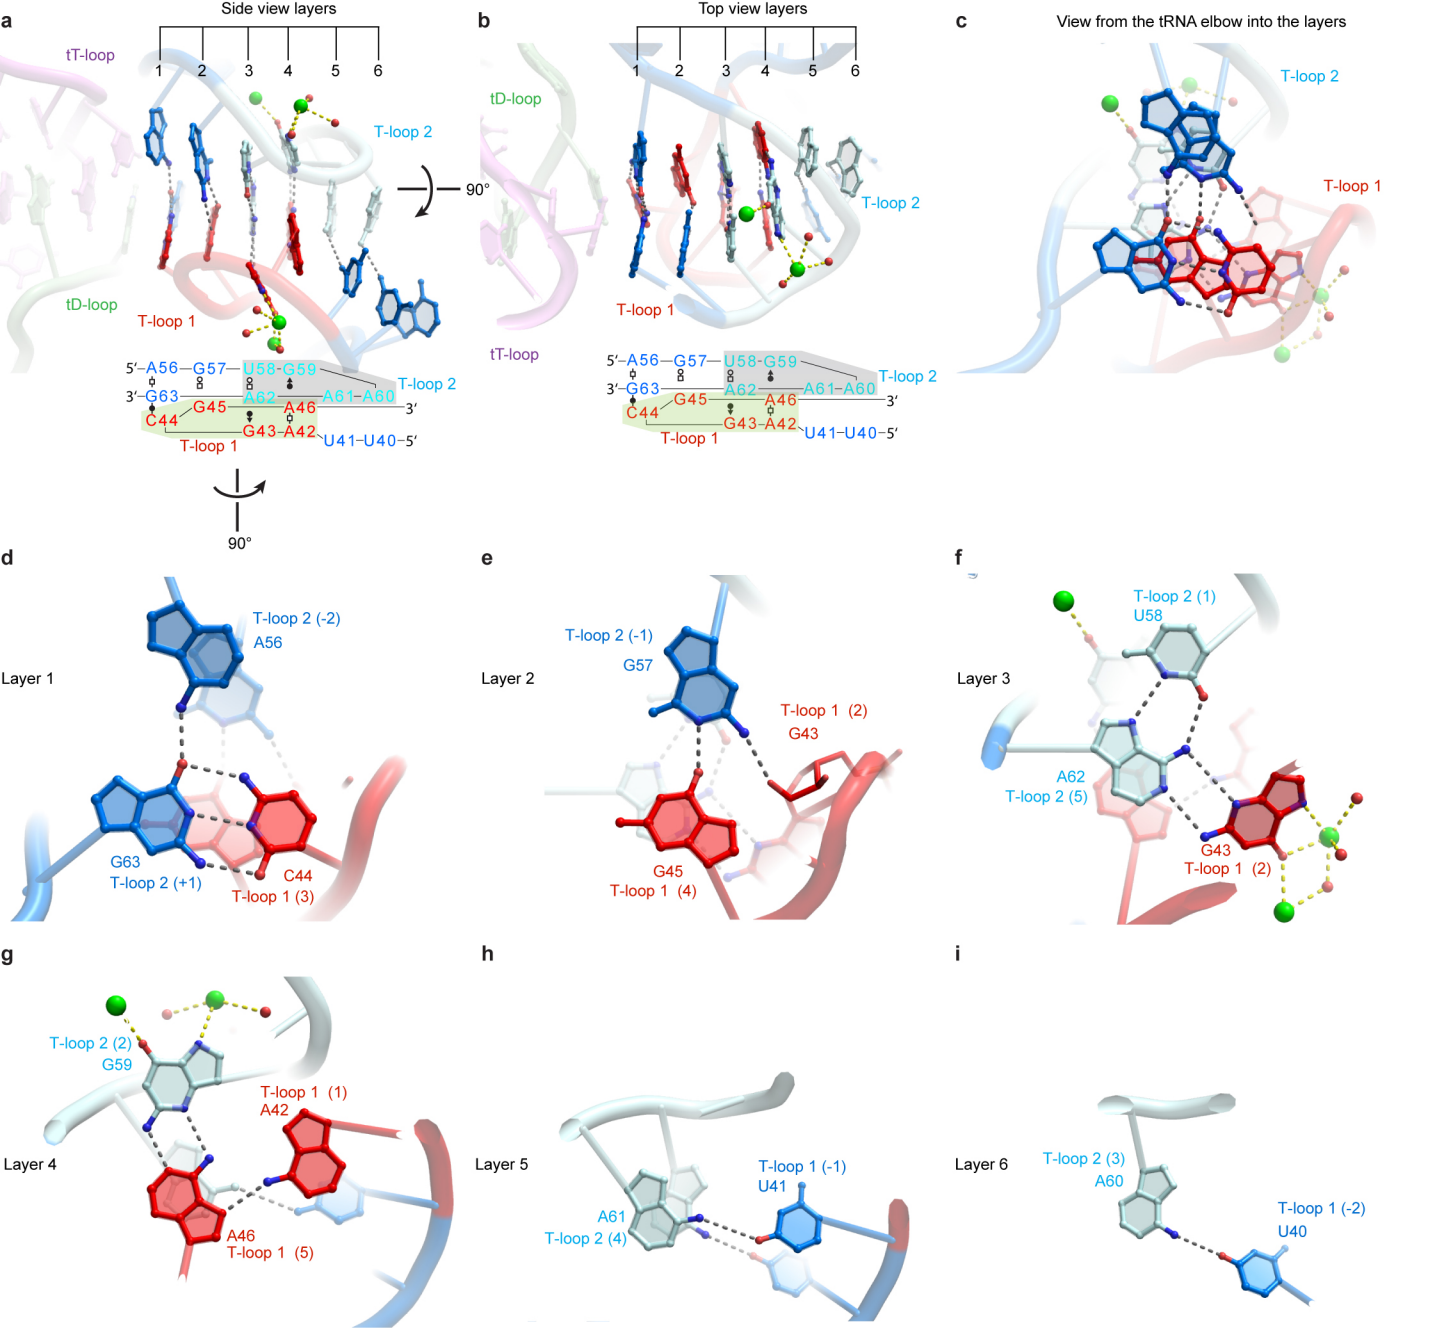

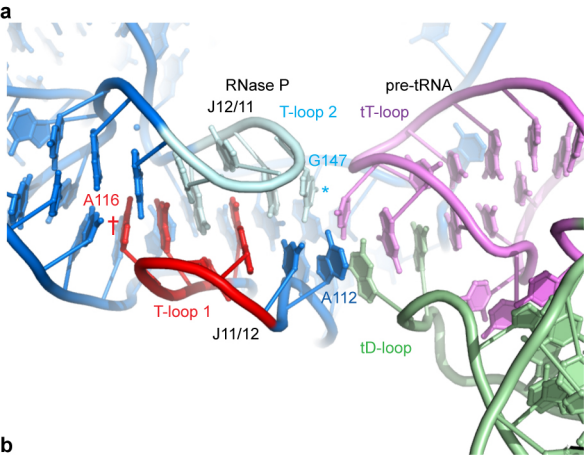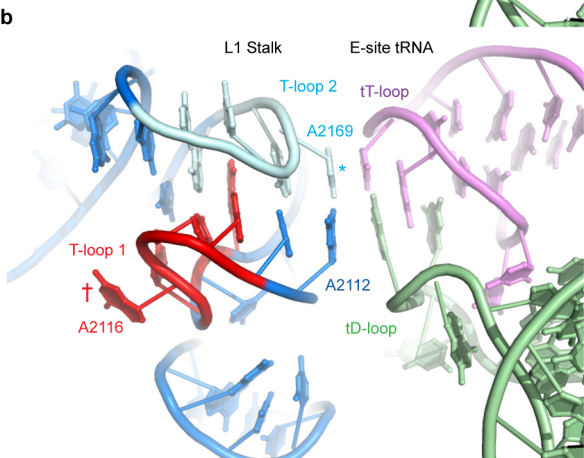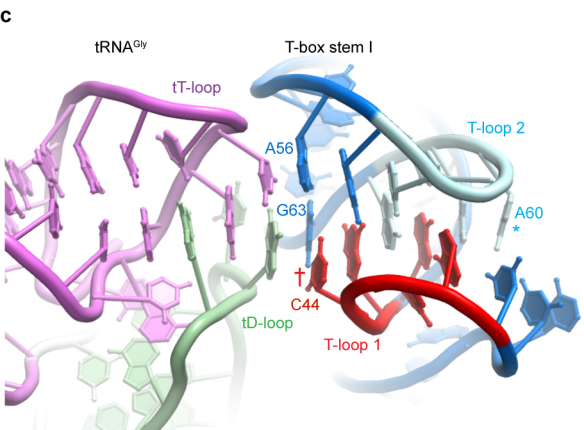

**a**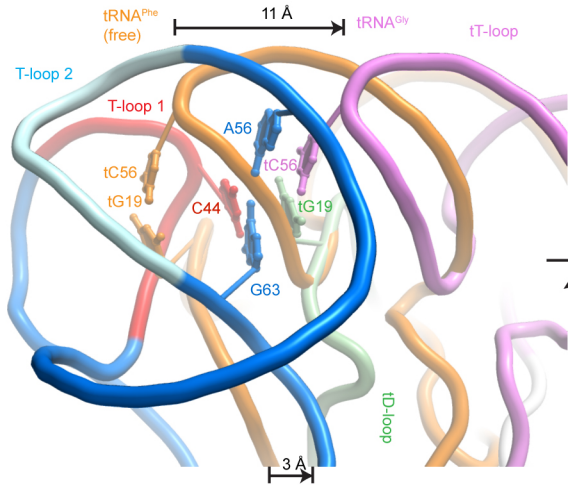**b**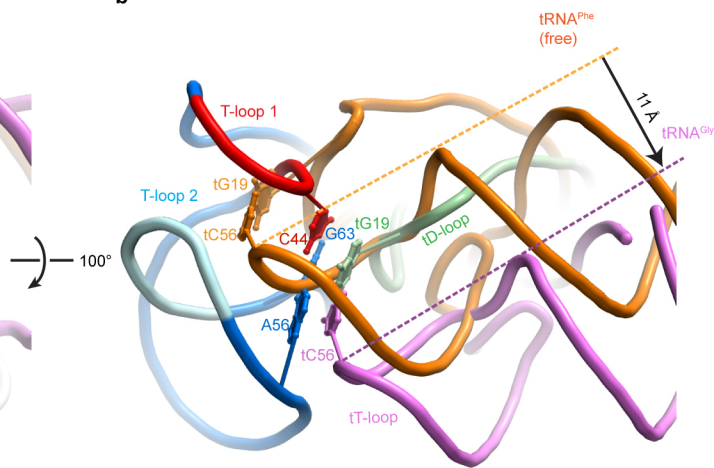

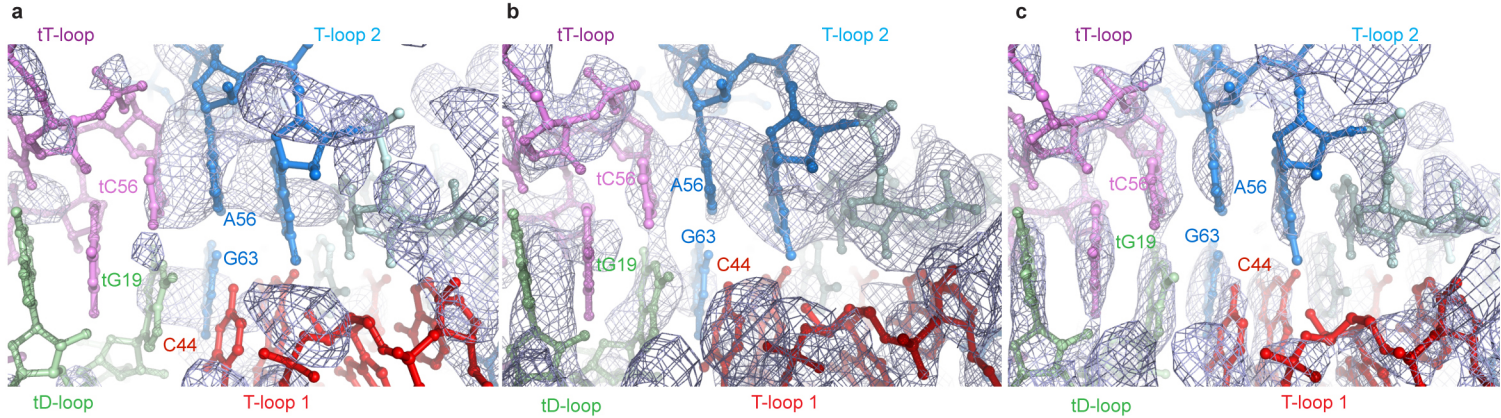

| T-box *                          | tRNA <sup>Gly</sup> | $K_d$ ( $\mu$ M) | $\log[K_a]$ | $\Delta H$ (kcal mol <sup>-1</sup> ) | $-T\Delta S$ (kcal mol <sup>-1</sup> ) † |
|----------------------------------|---------------------|------------------|-------------|--------------------------------------|------------------------------------------|
| 14-182 (wt) ‡                    | wt                  | 0.209 ± 0.025    | 6.68        | -29.9                                | 21.0                                     |
| 14-158 (wt) §                    | wt                  | 0.194 ± 0.055    | 6.72        | -41.2                                | 32.2                                     |
| 14-113 (wt)                      | wt                  | 0.150 ± 0.018    | 6.82        | -25.1                                | 15.9                                     |
| 14-113del_kturn ¶                | wt                  | 0.097 ± 0.008    | 7.01        | -23.6                                | 14.2                                     |
| $\Delta$ 29-30 ( $\Delta$ 42-43) | wt                  | 1.84 ± 0.42      | 5.74        | -27.0                                | 19.3                                     |
| G43U (G55U)                      | wt                  | 1.68 ± 0.16      | 5.78        | -39.7                                | 31.9                                     |
| C44U (C56U)                      | wt                  | 8.20 ± 2.9       | 5.08        | -45.3                                | 38.5                                     |
| C44A (C56A)                      | wt                  | 0.307 ± 0.038    | 6.51        | -30.7                                | 21.9                                     |
| C44G (C56G)                      | wt                  | 3.4 ± 2.3        | 5.47        | -42.1                                | 34.7                                     |
| A42G/A46G (A54G/A58G)            | wt                  | 9.0 ± 2.1        | 5.05        | -30.0                                | 23.2                                     |
| G56U (G68U)                      | wt                  | 4.6 ± 0.44       | 5.34        | -32.0                                | 24.8                                     |
| G56A (G68A)                      | wt                  | 0.406 ± 0.060    | 6.39        | -33.2                                | 24.6                                     |
| G59U (G71U)                      | wt                  | 0.538 ± 0.12     | 6.27        | -45.4                                | 36.9                                     |
| G59A (G71A)                      | wt                  | 1.69 ± 0.30      | 5.77        | -43.0                                | 35.2                                     |
| A61U (A73U)                      | wt                  | 0.125 ± 0.019    | 6.90        | -35.4                                | 26.1                                     |
| U58G/A62G (U70G/A74G)            | wt                  | 12.6 ± 8.3       | 4.90        | -28.2                                | 21.6                                     |
| G63C (G75C)                      | wt                  | 8.7 ± 0.84       | 5.06        | -30.0                                | 23.2                                     |
| C44G/G63C (C56G/G75C)            | wt                  | 1.9 ± 1.5        | 5.72        | -39.8                                | 32.2                                     |
| C44A/G63A (C56A/G75A)            | wt                  | 0.433 ± 0.31     | 6.36        | -32.0                                | 23.5                                     |
| G87U (G99U)                      | tC36A               | 7.6 ± 4.2        | 5.12        | -17.2                                | 10.4                                     |
| A90C (A102C)                     | wt                  | 0.641 ± 0.167    | 6.19        | -26.9                                | 18.6                                     |
| A90G (A102G)                     | wt                  | 0.070 ± 0.012    | 7.15        | -31.5                                | 21.9                                     |
| 14-113 (wt)                      | tA37U               | 0.125 ± 0.018    | 6.90        | -35.4                                | 26.1                                     |
| 14-113 (wt)                      | 3'GAAA #            | 0.083 ± 0.016    | 7.08        | -31.8                                | 22.3                                     |

|                                                         | Crystal I                 | Crystal II             | Crystal III            | Crystals I-II-III    |
|---------------------------------------------------------|---------------------------|------------------------|------------------------|----------------------|
| <b>Data collection</b>                                  |                           |                        |                        |                      |
| Space group                                             | C222 <sub>1</sub>         | C222 <sub>1</sub>      | C222 <sub>1</sub>      | C222 <sub>1</sub>    |
| Cell dimensions                                         |                           |                        |                        |                      |
| <i>a</i> , <i>b</i> , <i>c</i> (Å)                      | 100.3, 108.4, 266.8       | 99.1, 107.5, 266.1     | 100.3, 108.3, 267.8    | 100.0, 108.1, 266.9  |
| $\alpha$ , $\beta$ , $\gamma$ (°)                       | 90, 90, 90                | 90, 90, 90             | 90, 90, 90             | 90, 90, 90           |
| Resolution (Å)                                          | 28.42-3.20 (3.31-3.20)*   | 133.1-3.87 (4.08-3.87) | 133.9-3.76 (3.97-3.76) | 134-3.43 (3.61-3.43) |
| <i>R</i> <sub>merge</sub> (%)                           | 6.2 (104.8)               | 6.2 (67.1)             | 6.7 (59.5)             | 10.8 (82.8)          |
| $\langle I \rangle / \langle \sigma(I) \rangle$         | 11.1 (1.5)                | 14.3 (2.2)             | 14.2 (2.3)             | 23.7 (2.3)           |
| Completeness (%)                                        | 98.9 (98.8)               | 99.8 (99.7)            | 99.4 (99.2)            | 99.3 (96.0)          |
| Redundancy                                              | 6.1 (6.2)                 | 4.8 (4.8)              | 4.8 (4.7)              | 12.8 (6.2)           |
| <b>Refinement</b>                                       |                           |                        |                        |                      |
| Resolution (Å)                                          | 28.42-3.20 (3.31-3.20)    |                        |                        |                      |
| No. reflections                                         | 24325 (2369)              |                        |                        |                      |
| <i>R</i> <sub>work</sub> / <i>R</i> <sub>free</sub> (%) | 19.6 (33.6) / 25.2 (38.2) |                        |                        |                      |
| No. atoms                                               | 8742                      |                        |                        |                      |
| RNA                                                     | 7586                      |                        |                        |                      |
| Protein                                                 | 1048                      |                        |                        |                      |
| Ion                                                     | 86                        |                        |                        |                      |
| Water                                                   | 22                        |                        |                        |                      |
| Mean <i>B</i> -factors (Å <sup>2</sup> )                | 128.0                     |                        |                        |                      |
| RNA                                                     | 118.7                     |                        |                        |                      |
| Protein                                                 | 192.7                     |                        |                        |                      |
| Ligand/ion                                              | 176.4                     |                        |                        |                      |
| Water                                                   | 64.2                      |                        |                        |                      |
| R.m.s. deviations                                       |                           |                        |                        |                      |
| Bond lengths (Å)                                        | 0.001                     |                        |                        |                      |
| Bond angles (°)                                         | 0.37                      |                        |                        |                      |

## **Supplementary Information**

### **Co-crystal structure of a T-box riboswitch stem I domain in complex with its cognate tRNA**

Jinwei Zhang & Adrian R. Ferré-D'Amaré\*

National Heart, Lung and Blood Institute

50 South Drive, MSC 8012

Bethesda, MD, 20892-8012, USA

(\* Address correspondence to this author. E: [adrian.ferre@nih.gov](mailto:adrian.ferre@nih.gov)

T: 301-496-4096, F: 301-451-5459

## Supplementary Discussion

### Organization of the interdigitated T-loop motif.

The interface with tRNA (layer 1) is formed by C44 (position 3 of T-loop 1), A56 (position -2 of T-loop 2) and G63 (position +1 of T-loop 2). Two base triples (layers 3 and 4) form the core of the domain. In these layers, nucleotides at positions 1 and 5 of the two T-loops close each pentaloop through non-Watson-Crick base pairs (Hoogsteen-Hoogsteen A42•A46 in T-loop 1; WC-Hoogsteen U58•A62 in T-loop 2), while a conserved guanine (G43 or G59) at position 2 of the other T-loop forms a base triple with the 1•5 closing pair using its sugar edge. This exposes the Hoogsteen face of the position 2 guanine to solvent, available for coordination by divalent cations. Substitution of either closing pair with a G•G pair is strongly destabilizing, reducing tRNA binding by ~2 orders of magnitude (A42G/A46G and U58G/A62G, Fig. 2e). Similarly, removal of the sugar edge exocyclic amine by substituting guanines with adenines at position 2, either completely or strongly abrogated tRNA binding (G43A of T-loop 1 and G59A of T-loop 2, respectively, Fig. 2e). Equivalent substitutions of T-loop 1 consistently produce larger tRNA binding defects than those of T-loop 2, presumably reflecting the proximity of T-loop 1 to the tRNA interface. Unlike RNase P<sup>1</sup> and the ribosome<sup>2</sup>, the T-box uses a base triple on layer 1 to stack on the tRNA elbow. A Watson-Crick pair (C44•G63) stacks on tG19 while A56 (phylogenetically most commonly a guanine, as in the *B. subtilis glyQS stem I*, Extended Data Fig. 1) stacks on tC56. This arrangement results in a displaced, energetically near-optimal stacking conformation (Fig. 2c) rather than the energetically less favorable "sandwich" arrangement<sup>3,4</sup>. Watson-Crick pairing at the base triple is not obligatory for effective stacking of stem I with the tRNA elbow, as the double substitution C44A/G63A only produced a less than 3-fold effect (Fig. 2e). Reversing the GC pair through a C44G/G63C substitution, however, led to a larger defect (13-fold, Fig. 2e). This could indicate that this double substitution places G44 in unfavorable "sandwich" stacking with tG19, and leave C63 unstacked from tG19 (Fig. 2c). Substituting pyrimidines for either of the two purines of the base triple (G56U or G63C) causes significant defects in tRNA binding whereas a transition mutation (G56A) is well tolerated. These findings are in good agreement with the cocrystal structure and the phylogenetic prevalence of purines at the distal base triple (Fig. 2e, Extended Data Fig. 1).

## Supplementary References

1. Reiter, N. J. *et al.* Structure of a bacterial ribonuclease P holoenzyme in complex with tRNA. *Nature* **468**, 784-789 (2010).
2. Korostelev, A., Trakhanov, S., Laurberg, M. & Noller, H. Crystal structure of a 70S ribosome-tRNA complex reveals functional interactions and rearrangements. *Cell* **126**, 1065-1077 (2006).
3. Burley, S. K. & Petsko, G. A. Weakly polar interactions in proteins. *Adv. Prot. Chem.* **39**, 125-192 (1988).
4. Burley, S. K. & Petsko, G. A. Aromatic-aromatic interaction: a mechanism of protein structure stabilization. *Science* **229**, 23-28. (1985).
